# Supplementary material for: Inactivation of MrPigH in Monascus ruber M7 Results in its Monascus Pigments Increase and Citrinin Decrease with mrpyrG Selection Marker
Source: Preprints.org preprint supplement (doi:10.20944/preprints202111.0347.v1), 2021-11-19
Supplement: Supplementary file 1 [file supplementary]

**Table S1.** Primers used in RT-qPCR

| **Names** | **Sequences (5’ 3’)** | **Descriptions** | |
| --- | --- | --- | --- |
| mrpigA qF | CTCGAGGAATTGAGCGTTGG | For RT-qPCR analysis of *mrpigA* (187 bp) | |
| mrpigA qR | CAGGAAGACTCAATTCGCCG |
| mrpigB qF | CAGAAACCATCACGCAGGAG | For RT-qPCR analysis of *mrpigB* (246 bp) | |
| mrpigB qR | AAAGAAGCAGCGGGTCTACT |
| mrpigC qF | CCTACCCAGCAATCGATCCT | For RT-qPCR analysis of *mrpigC* (169 bp) | |
| mrpigC qR | ACGTCCTTTGCTAGCTCTGT |
| mrpigD qF | GTACGCGGGGAAGTTCAATC | For RT-qPCR analysis of *mrpigD* (212 bp) | |
| mrpigD qR | CCCCAATATCCTCCCTCGTC |
| mrpigE qF | CTGTACAACGTCCTGCATCG | For RT-qPCR analysis of *mrpigE* (247 bp) | |
| mrpigE qR | TCTCCCGAATCGTATCCAGC |
| mrpigF qF | GTCACGTCTCAGATCGCAAC | For RT-qPCR analysis of *mrpigF* (209 bp) | |
| mrpigF qR | CTGGCACTGTCGATGAACTG |
| mrpigG qF | TACAAGGAGTTCGGGCCATT | For RT-qPCR analysis of *mrpigG* (199 bp) | |
| mrpigG qR | GCAGGCTAGCACACATCTTC |
| mrpigH qF | TCGTCTCGTGGATCATCTCG | For RT-qPCR analysis of *mrpigH* (197 bp) | |
| mrpigH qR | GATGCTCTCCAATCCCTTGC |
| mrpigI qF | CATCTTGGACGGGATTGCAG | For RT-qPCR analysis of *mrpigI* (162 bp) | |
| mrpigI qR | ATCTCGTCCTTGCTCACACA |
| mrpigJ qF | CGTTTCGGCTGATCATTCGT | For RT-qPCR analysis of *mrpigJ* (236 bp) | |
| mrpigJ qR | CGATCCCGCTGAAGAACTTG |
| mrpigK qF | CAATCGGACGGGAAATGACC | For RT-qPCR analysis of *mrpigK* (176 bp) | |
| mrpigK qR | CTTTGAGTCTCATCGCCAGC |
| mrpigL qF | TCAGGGATTGTGGGATTGCT | For RT-qPCR analysis of *mrpigL* (220 bp) | |
| mrpigL qR | CTTGCATCGCCTTGTCAACT |
| mrpigM qF | GTGACTTTGAACAGCCTGGG | For RT-qPCR analysis of *mrpigM* (241 bp) | |
| mrpigM qR | CGCTCAATTCCTTCTCCAGC |
| mrpigN qF | CGATGCAATGGGGAGAGAGA | For RT-qPCR analysis of *mrpigN* (200 bp) | |
| mrpigN qR | CGAATCCAGAGAAGGCTTGC |
| mrpigO qF | AACTGCTCTTCGAGACGGAT | For RT-qPCR analysis of *mrpigO* (168 bp) | |
| mrpigO qR | CGAACTCCAGCAGCAACTTC |
| mrpigP qF | CTATTTGGTGCGGACGAGTG | For RT-qPCR analysis of *mrpigP* (186 bp) | |
| mrpigP qR | TCCAACACCTCTTCGATGCT |
| Beta-actin F | TCTGGCACCACACATTCTACAA | For RT-qPCR analysis of *beta-actin* (120 bp) |
| Beta-actin R | CGAAGACGATCTGGGTCATCT |
| mrl7 qF | GAAGTGATTCTCAGCGCTGG | For RT-qPCR analysis of *mrl7* (215 bp) |
| mrl7 qR | AGAGCGGGATCCTTGAACAA |
| mrl6 qF | GCCATGCTGCCTCTTCTTTT | For RT-qPCR analysis of *mrl6* (241 bp) |
| mrl6 qR | ACTTTGCCTTGGTGTCTTCG |
| mrl5 qF | ATGTCTGCTATCCCTCCTGC | For RT-qPCR analysis of *mrl5* (242 bp) |
| mrl5 qR | TAGAGGTAGAGCTTGGTGGC |

**Table S1.** Primers used in RT-qPCR

| **Names** | **Sequences (5’ 3’)** | **Descriptions** | |
| --- | --- | --- | --- |
| mrl4 qF | CGCTTGTCAAGATGGTCTCG | For RT-qPCR analysis of *mrl4* (190 bp) |
| mrl4 qR | TCGCCCTTGTTGAAGAAAGC |
| mrl3 qF | CCGAGCCAGACATGTCATTG | For RT-qPCR analysis of *mrl3* (217 bp) |
| mrl3 qR | GATGTCTTCTTCGCGGCATT |
| mrl2 qF | AGACATTCCCCTCGACGATC | For RT-qPCR analysis of *mrl2* (165 bp) |
| mrl2 qR | GCGACAAGGTCCAACACTAC |
| mrl1 qF | GTCTGATGCTGAGCCCAATG | For RT-qPCR analysis of *mrl1* (246 bp) |
| mrl1 qR | CGGATTTGTTGGCGGTAGAG |
| mrpks qF | AAGCCAATATTCAGCGCCTG | For RT-qPCR analysis of *mrpks* (235 bp) |
| mrpks qR | GCACCAGTAACAAGCACACA |
| mrr1 qF | GTCGTACCGGAAGATCGTCT | For RT-qPCR analysis of *mrr1* (173 bp) |
| mrr1 qR | TAGTTCAGGCCTTGCATCCA |
| mrr2 qF | ATGATCTGGAAGGCTACGGG | For RT-qPCR analysis of *mrr2* (196 bp) |
| mrr2 qR | GGCACCTTGGTCTTCTCTCT |
| mrr3 qF | CAGTCCAAGAACCGCTATGC | For RT-qPCR analysis of *mrr3* (171 bp) |
| mrr3 qR | AAACTGGGATGGGAGGATGG |
| mrr4 qF | GGGCACACATCCATCGATTC | For RT-qPCR analysis of *mrr4* (239 bp) |
| mrr4 qR | GCGTCGTAGTTAAAGGCTCG |
| mrr5 qF | ACATCCTTCACCCAACCGAT | For RT-qPCR analysis of *mrr5* (246 bp) |
| mrr5 qR | TCAGTTCGGTCAGCTTCAGT |
| mrr6 qF | CTTTCCTACTCCTCCGCCAA | For RT-qPCR analysis of *mrr6* (160 bp) |
| mrr6 qR | CGAAGAAAGCGATCAGGACG |
| mrr7 qF | TCGAGAAGACAGAACGTGCT | For RT-qPCR analysis of *mrr7* (152 bp) |
| mrr7 qR | CACAAAGTCAATGCCACCCA |
| mrr8 qF | CCCAAACCCGCTATTGTCAG | For RT-qPCR analysis of *mrr8* (158 bp) |
| mrr8 qR | CCGACCGTTAAACAAGCACA |
